# Supplementary material for: Single-cell RNA-seq transcriptome analysis of linear and circular RNAs in mouse preimplantation embryos
Source: PubMed Central journal article supplement (PMC4511241; doi:10.1186/s13059-015-0706-1), 2015-07-23
Supplement: 13059_2015_706_MOESM2_ESM.pdf [file 13059_2015_706_MOESM2_ESM.pdf]

## Additional file 2. Spike-in RNAs in SUPeR-seq mouse ESC samples

| RNA | Sequence (5' - 3')                                                                                                                                                                                                                                                                                                                                                                                                                                                                                                                                                                                                                                                                                                                                                                                                                                     |
|-----|--------------------------------------------------------------------------------------------------------------------------------------------------------------------------------------------------------------------------------------------------------------------------------------------------------------------------------------------------------------------------------------------------------------------------------------------------------------------------------------------------------------------------------------------------------------------------------------------------------------------------------------------------------------------------------------------------------------------------------------------------------------------------------------------------------------------------------------------------------|
| GFP | GCTTTACTTGTACAGCTCGTCCATGCCGAGAGTGATCCCGGCGGCGGTCACGAACTCCAGCAG<br>GACCATGTGATCGCGCTTCTCGTTGGGGTCTTTGCTCAGGGCGGACTGGGTGCTCAGGTAGTG<br>GTTGTCGGGCAGCAGCACGGGGCCGTCGCCGATGGGGGTGTTCTGCTGGTAGTGGTCGGCG<br>AGCTGCACGCTGCCGTCTCGATGTTGTGGCGGATCTTGAAGTTCACCTTGATGCCGTTCTTCT<br>GCTTGTGGCCATGATATAGACGTTGTGGCTGTTGTAGTTGTACTCCAGCTTGTGCCCCAGGAT<br>GTTGCCGTCTCCTTGAAGTCGATGCCCTTCAGCTCGATGCGGTTACCAGGGTGTGCCCCCTCG<br>AACTTCACCTCGGCGCGGGTCTTGTAGTTGCCGTCGTCCTTGAAGAAGATGGTGCCTCCTGG<br>ACGTAGCCTTCGGGCATGGCGGACTTGAAGAAGTCGTGCTGCTTTCATGTGGTCGGGGTAGCG<br>GCTGAAGCACTGCACGCCGTAGGTCAGGGTGGTACGAGGGTGGGCCAGGGCACGGGCAG<br>CTTGCCGGTGGTGCAGATGAACTTCAGGGTTCAGCTTGCCGTAGGTGGCATGCCCTCGCCCTC<br>GCCGGACACGCTGAACTTGTGGCCGTTTACGTCGCCGTCCAGCTCGACCAGGATGGGCACCA<br>CCCCGGTGAACAGCTCCTCGCCCTTGTACCATGGTGGCGACCGGCGATGGATCCTGCAAAA<br>AGAACAAGTAGCTTGTATTCTATAGTGT |
| RFP | CCTTGAGCCGTAAGGAACTGAGGGGACAGGATGTCCAGGCGAAGGGCAGGGGGCCGCC<br>CTTGGTCACCTCAGCTTGGCGGTCTGGGTGCCCTCGTAGGGGCGGCCCTCGCCCTCGCCCTC<br>GATCTCGAACTCGTGCCGTTACGGAGCCCTCCATGCGCACCTTGAAGCGCATGAACTCCTT<br>GATGACGTCCTCGGAGGAGGCCATGGTGGCGGGATCCTGCAAAAAGAACAAGTAGCTTGTAT<br>TCTATAGTGT                                                                                                                                                                                                                                                                                                                                                                                                                                                                                                                                                                          |
| Cre | CGCCGCATAACCAGTGAACAGCATTGCTGTCACTTGGTCTGGCAGCCCGGACCGACGATGA<br>AGCATGTTTAGCTGGCCAAATGTTGCTGGATAGTTTTACTGCCAGACCGCGCGCTGAAGAT<br>ATAGAAGATAATCGCGAACATCTTCAGGTTCTGCGGAAACCATTTCGGTTATTCAACTTGCA<br>CCATGCCGCCACGACCGGCAAACGGACAGAAGCATTTTCCAGGTATGCTCAGAAAACGCCTG<br>GCGATCCCTGAACATGTCCATCAGGTTCTTGC AACCTCATCACTCGTTGCATCGACCGGTAAT<br>GCAGGCAAATTTTGGTGTACGGTCAGTAAATTGGACACCTTCTTCTTCTTGGGCATAGATC<br>CTGCAAAAAGAACAAGTAGCTTGTATTCTATAGTGT                                                                                                                                                                                                                                                                                                                                                                                                        |
